# Supplementary material for: Recovery of Aconitic Acid from Sweet Sorghum Plant Extract Using a Solvent Mixture, and Its Potential Use as a Nematicide
Source: MDPI journal article supplement (doi:10.3390/life13030724), 2023-03-08
Supplement: s1 [file s1]

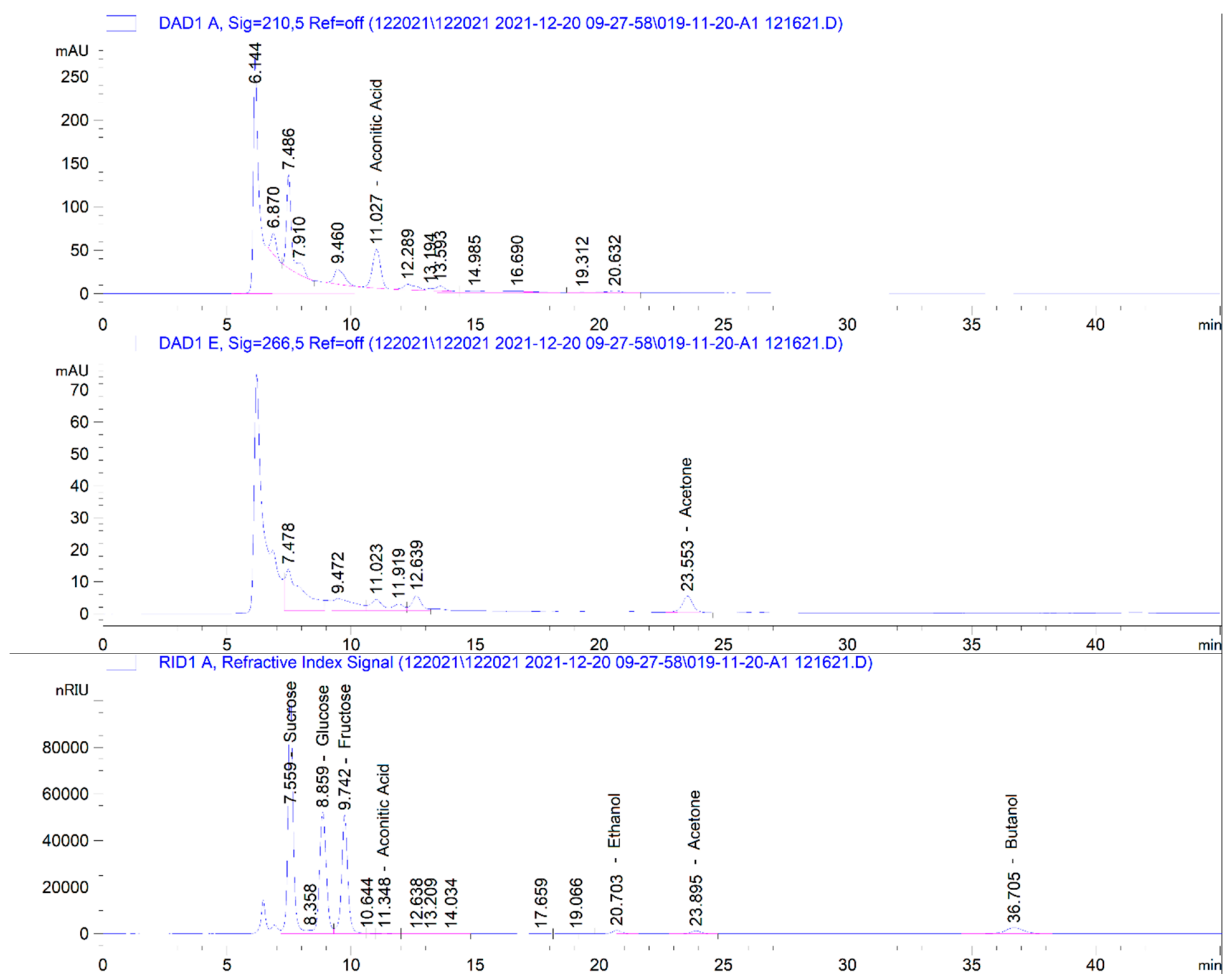

Figure S1. Example HPLC chromatogram with labeled peaks. Experimental Conditions: ABE extraction of commercial sweet sorghum syrup containing TAA. Organics/Syrup Ratio = 1.0 wt/wt. A/B/E Ratio = 0.08/0.84/0.07 (wt/wt/wt). HPLC conditions were described in reference 13, using RID and DAD (210 and 266 nm) sequential detectors.
